# Supplementary material for: Source and regulation of flux variability in Escherichia coli
Source: PubMed Central journal article supplement (PMC4074586; doi:10.1186/1752-0509-8-67), 2014-06-14
Supplement: 1752-0509-8-67-S2.pdf [file 1752-0509-8-67-S2.pdf]

**Additional file 2: Glucose minimal medium for *iJO1366 in silico* model.**

Table S1. **Reference conditions: Glucose minimal medium (*iJO1366* model)<sup>1</sup>.** The external input rates are defined as positive and the external output rates as negative.

| External species (reaction) | Lower bound | Upper bound |
|-----------------------------|-------------|-------------|
| Glucose (glc)               | -1000       | 10          |
| Oxygen (o2)                 | -1000       | 1000        |
| Ammonium (nh4)              | -1000       | 1000        |
| Phosphate (pi)              | -1000       | 1000        |
| Sulfate (so4)               | -1000       | 1000        |
| Carbon dioxide (co2)        | -1000       | 1000        |
| Water (h2o)                 | -1000       | 1000        |
| Proton (h)                  | -1000       | 1000        |
| Calcium (ca2)               | -1000       | 1000        |
| Cobalt (cobalt2)            | -1000       | 1000        |
| Copper (cu2)                | -1000       | 1000        |
| Iron II (fe2)               | -1000       | 1000        |
| Iron III(fe3)               | -1000       | 1000        |
| Potassium (k)               | -1000       | 1000        |
| Magnesium (mg2)             | -1000       | 1000        |
| Manganese (mn2)             | -1000       | 1000        |
| Molybdenum (mobd)           | -1000       | 1000        |
| Nickel (ni2)                | -1000       | 1000        |
| Zinc (zn2)                  | -1000       | 1000        |
| Chloride (cl)               | -1000       | 1000        |

<sup>1</sup> fermentation products, not present in the medium, have upper bounds equal to zero.
