# Supplementary material for: Source and regulation of flux variability in Escherichia coli
Source: PubMed Central journal article supplement (PMC4074586; doi:10.1186/1752-0509-8-67), 2014-06-14
Supplement: 1752-0509-8-67-S3.pdf [file 1752-0509-8-67-S3.pdf]

Additional file 3: Growth rate vs. glucose uptake.

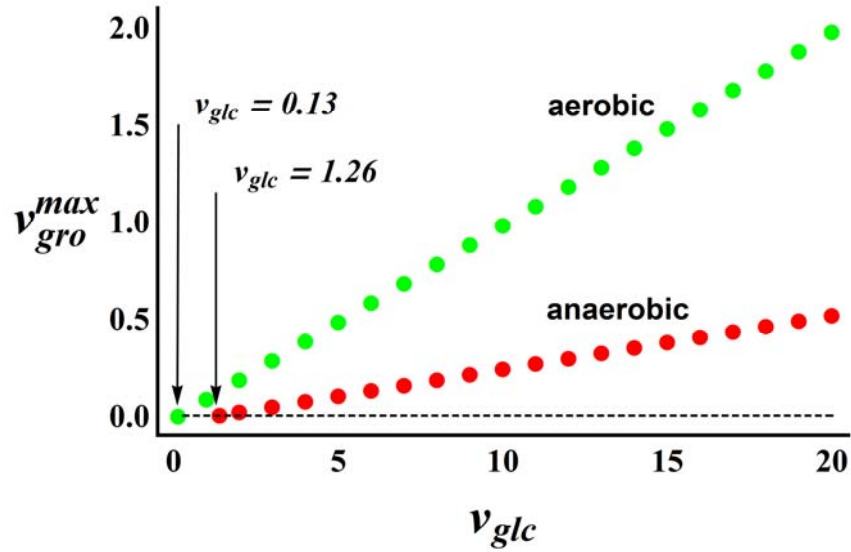

Figure S1. **Maximum growth rate vs. glucose uptake.** Aerobic (●) and anaerobic (●) conditions are represented. The minimum glucose uptakes to fulfill the requirements of ATP for cell maintenance are 0.13 and 1.26 for aerobic and anaerobic conditions, respectively.
