# Supplementary material for: Source and regulation of flux variability in Escherichia coli
Source: PubMed Central journal article supplement (PMC4074586; doi:10.1186/1752-0509-8-67), 2014-06-14
Supplement: 1752-0509-8-67-S4.pdf [file 1752-0509-8-67-S4.pdf]

**Additional file 4: Flux variability vs. glucose uptake, in anaerobic conditions.**

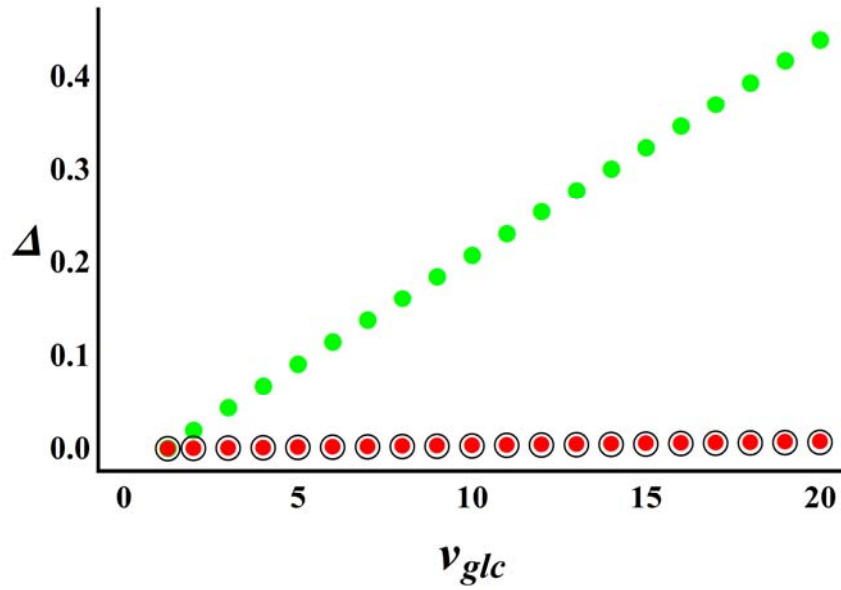

Figure S2. **Components of flux variability vs. glucose uptake (anaerobic conditions).**  $\circ$  represents  $\Delta_{int}$ ,  $\bullet$  represents  $\Delta_{int} + \Delta_{ext}$  and  $\bullet$  represents  $\Delta_{tot} = \Delta_{int} + \Delta_{ext} + \Delta_{gro}$ .  $\Delta_{gro}$  is the only significant component of flux variability,  $\Delta_{int}$  and  $\Delta_{ext}$  having negligible values for all the range of glucose uptakes studied (the physiological values of glucose uptake are between 0 and 10).
